# Supplementary material for: Photoluminescence profile mapping of Eu(iii) and Tb(III → IV)-embedded in quantum size SnO2 nanoparticles
Source: Royal Society of Chemistry journal article supplement (doi:10.1039/c4ra03966a), 2014-01-01
Supplement: c4ra03966a1.pdf [file c4ra03966a1.pdf]

## **Supporting Information**

### **Photoluminescence Profile Mapping of Eu(III) and Tb(III → IV)- Embedded in Quantum Size SnO<sub>2</sub> Nanoparticles**

**Young In Choi and Youngku Sohn\***

*Department of Chemistry, Yeungnam University, Gyeongsan, Gyeongbuk 712-  
749, South Korea*

\* Corresponding author e-mail: [youngkusohn@ynu.ac.kr](mailto:youngkusohn@ynu.ac.kr)

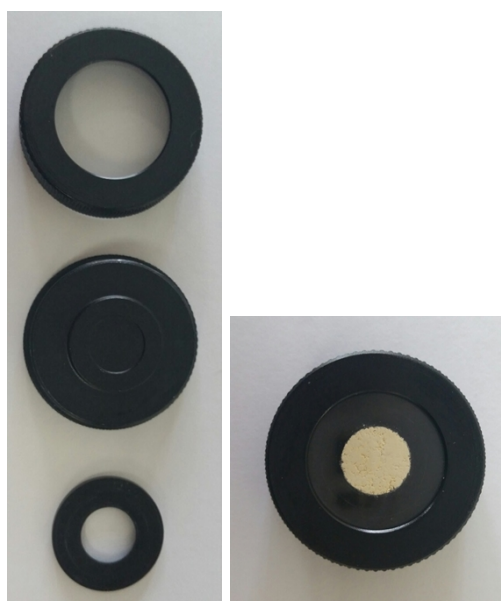

**Fig. S1.** Powder sample holder before (left) and after (right) sample mounting. Incident light only strikes the central area of the powder sample.

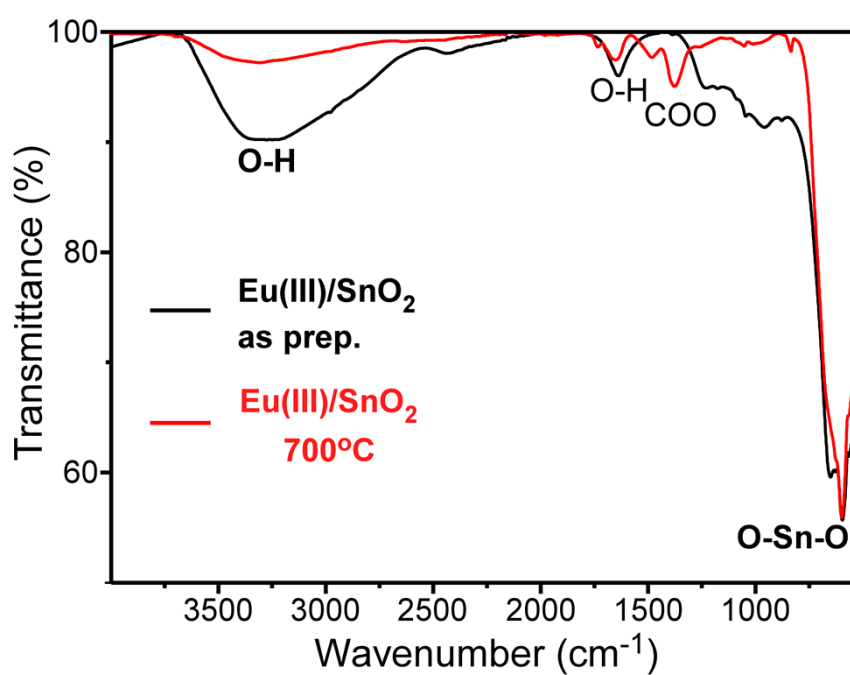

**Fig. S2.** Typical FT-IR spectra of 10 mol% Eu(III)-doped  $\text{SnO}_2$  before and after thermal annealing.

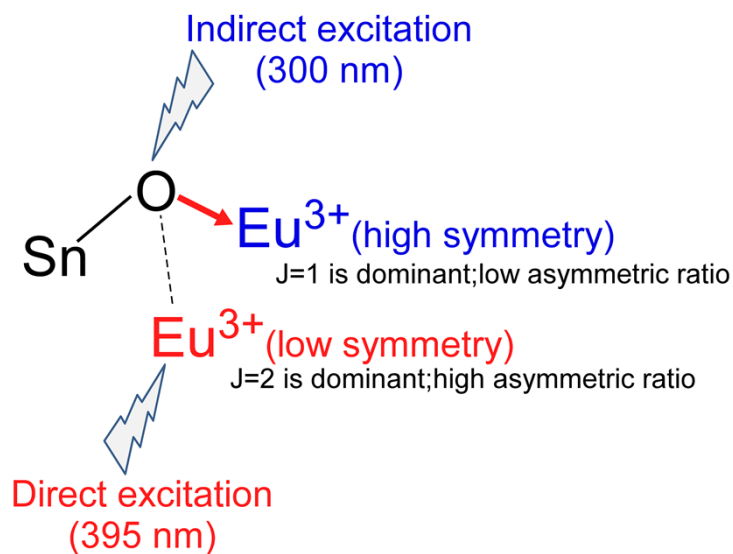

**Fig. S3.** Direct (395 nm) and indirect (300 nm) excitation photoluminescence mechanism and their consequent asymmetric ratios ( $I_{J=2}/I_{J=1}$ ).

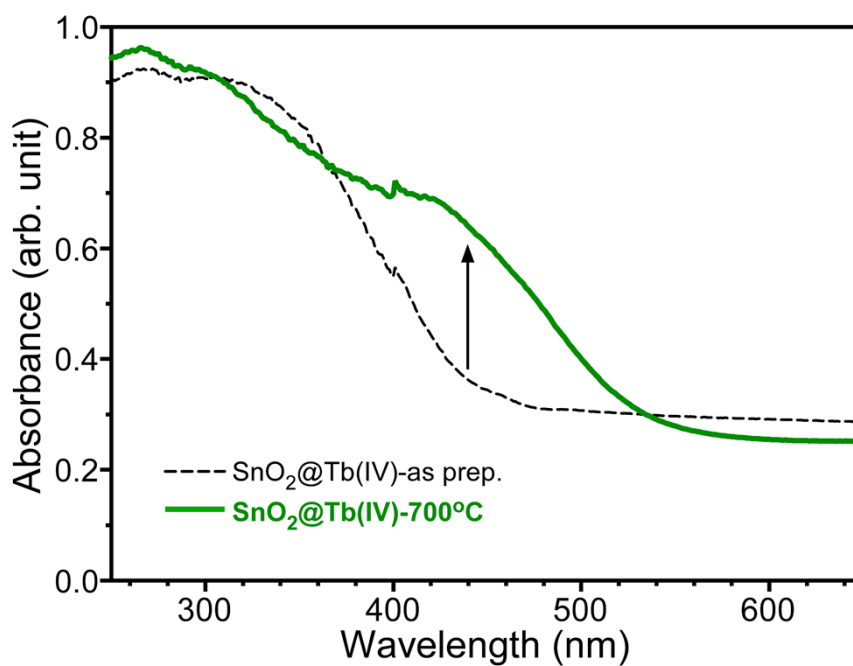

**Fig. S4.** UV-Vis absorption spectra of as-prepared and 700°C-annealed 10 mol% Tb(IV)/SnO<sub>2</sub> nanoparticles.
